# Supplementary material
Source: ML conference proceedings conference paper supplement (https://openaccess.thecvf.com/content/ICCV2025/html/Ren_Beyond_Next-Token_Next-X_ICCV_2025_paper.html)
Supplement: Supplementary file 1 [file Ren_Beyond_Next-Token_Next-X_ICCV_2025_supplemental.pdf]

# Beyond Next-Token: Next-X Prediction for Autoregressive Visual Generation

## Supplementary Material

### Appendix

The supplementary material includes the following additional information:

- Sec. A details the hyper-parameters used for xAR.
- Sec. B provides a comprehensive speed comparison.
- Sec. C discusses the limitations and future directions.
- Sec. D presents visualization samples generated by xAR.

### A. Hyper-parameters for xAR

We list the detailed training and inference hyper-parameters in Tab. 1.

| config                   | value        |
|--------------------------|--------------|
| optimizer                | AdamW [1, 3] |
| optimizer momentum       | (0.9, 0.96)  |
| weight decay             | 0.02         |
| batch size               | 2048         |
| learning rate schedule   | cosine decay |
| peak learning rate       | 4e-4         |
| ending learning rate     | 1e-5         |
| total epochs             | 800          |
| warmup epochs            | 100          |
| dropout rate             | 0.1          |
| attn dropout rate        | 0.1          |
| class label dropout rate | 0.1          |
| inference mode           | SDE          |
| inference steps          | 50           |

Table 1. Detailed Hyper-parameters of xAR Models.

### B. Speed Comparison.

We compare xAR with diffusion-, flow matching-, and autoregressive-based models in Tab. 2. Our most lightweight variant, xAR-B (172M), outperforms DiT-XL (diffusion-based), SiT-XL (flow matching-based), and MAR (autoregressive-based), while achieving a  $20\times$  speedup (9.8 vs. 0.5 images/sec). Additionally, xAR-L surpasses the recent state-of-the-art model REPA, running  $5.3\times$  faster (3.2 vs. 0.6 images/sec). Finally, our largest model, xAR-H, achieves 1.24 FID on ImageNet-256, setting a new state-of-the-art, while still running  $2.2\times$  faster than REPA.

### C. Discussion and Limitations

Our empirical evaluations indicate that a square  $8\times 8$  cell configuration achieves the best performance, with no noticeable difference when using rectangular cells (e.g.,  $k/2 \times 2k$  or  $2k \times k/2$ ), which introduce additional complexity

| method       | type  | #params | FID↓ | steps | images/sec |
|--------------|-------|---------|------|-------|------------|
| DiT-XL/2 [5] | Diff. | 675M    | 2.27 | 250   | 0.5        |
| SiT-XL/2 [4] | Flow. | 675M    | 2.02 | 250   | 0.5        |
| MAR-L [2]    | AR    | 479M    | 1.78 | 256   | 0.5        |
| xAR-B        | xAR   | 172M    | 1.72 | 50    | 9.8        |
| MAR-H [2]    | MAR   | 943M    | 1.55 | 256   | 0.3        |
| REPA [6]     | Flow. | 675M    | 1.42 | 250   | 0.6        |
| xAR-L        | xAR   | 608M    | 1.28 | 50    | 3.2        |
| xAR-H        | xAR   | 1.1B    | 1.24 | 50    | 1.3        |

Table 2. Sampling Throughput Comparison. Throughputs are evaluated as samples generated per second on a single A100 based on their official codebases.

without clear benefits. Given that different regions in an image contain varying levels of semantic information (e.g., dense object areas vs. uniform sky regions), future research could explore whether dynamically shaped prediction entities provide additional benefits. However, in this work, we adopt a simple yet effective square cell design, demonstrating state-of-the-art results on the challenging ImageNet generation benchmark.

### D. Visualization of Generated Samples

Additional visualization results generated by xAR-H are provided from Fig. 1 to Fig. 9.

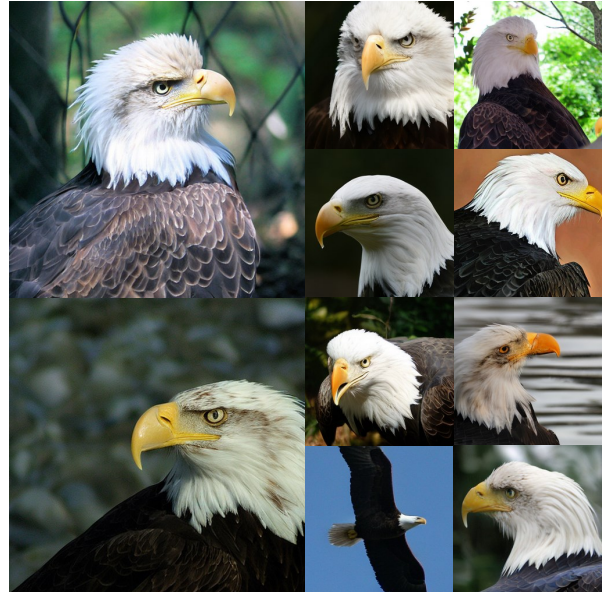

Figure 1. Generated Samples from xAR. xAR is able to generate high-fidelity American eagle (22) images.

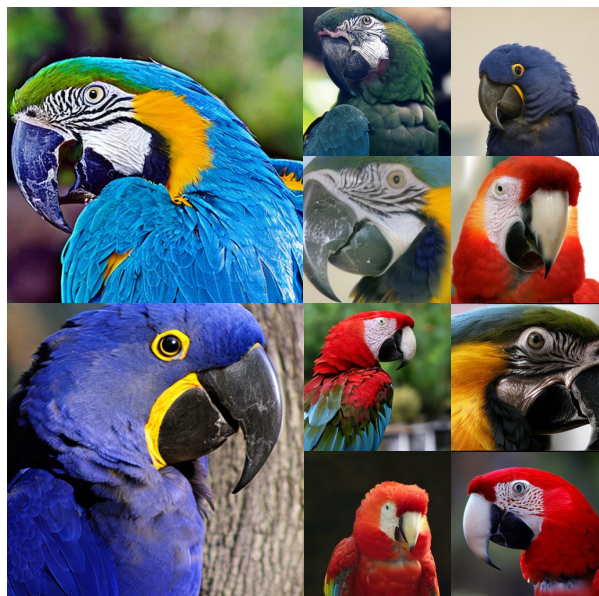

Figure 2. **Generated Samples from xAR.** xAR is able to generate high-fidelity macaw (88) images.

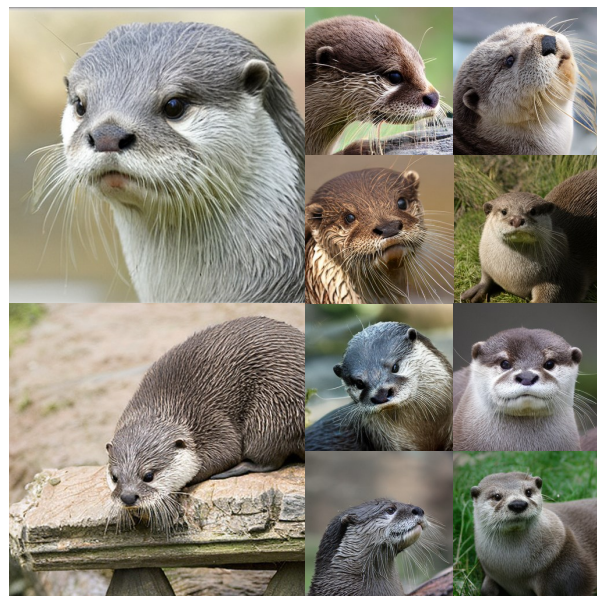

Figure 4. **Generated Samples from xAR.** xAR is able to generate high-fidelity otter (360) images.

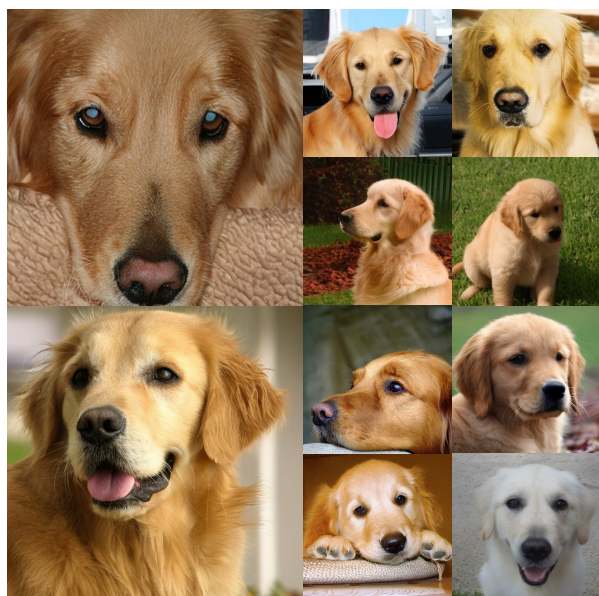

Figure 3. **Generated Samples from xAR.** xAR is able to generate high-fidelity golden retriever (207) images.

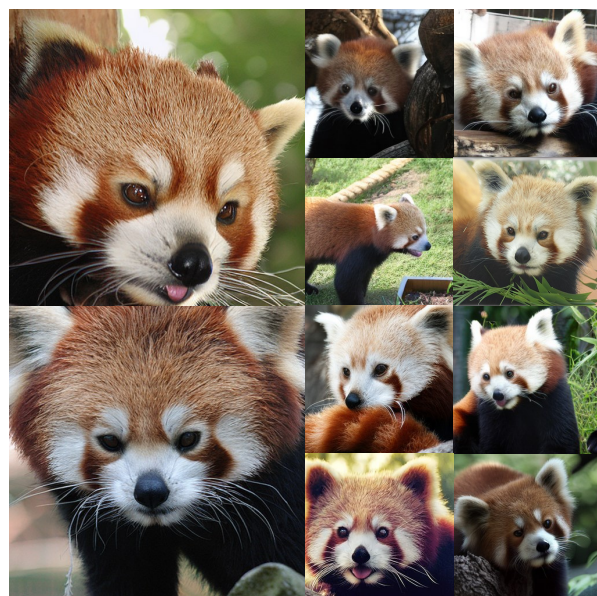

Figure 5. **Generated Samples from xAR.** xAR is able to generate high-fidelity lesser panda (387) images.



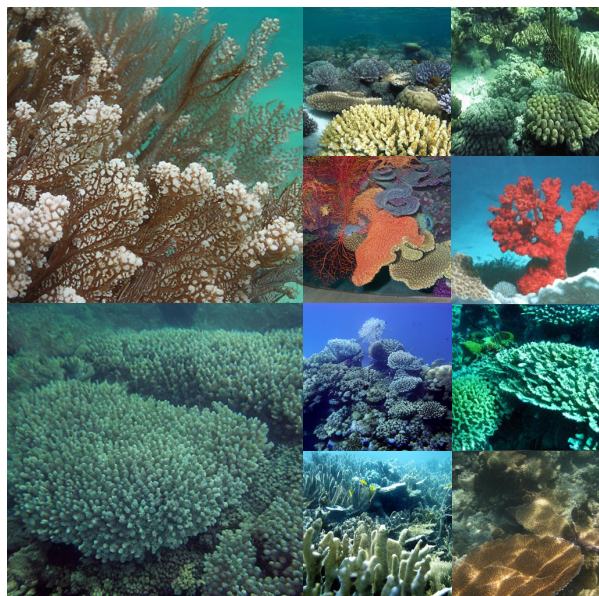

Figure 6. **Generated Samples from xAR.** xAR is able to generate high-fidelity coral reef (973) images.

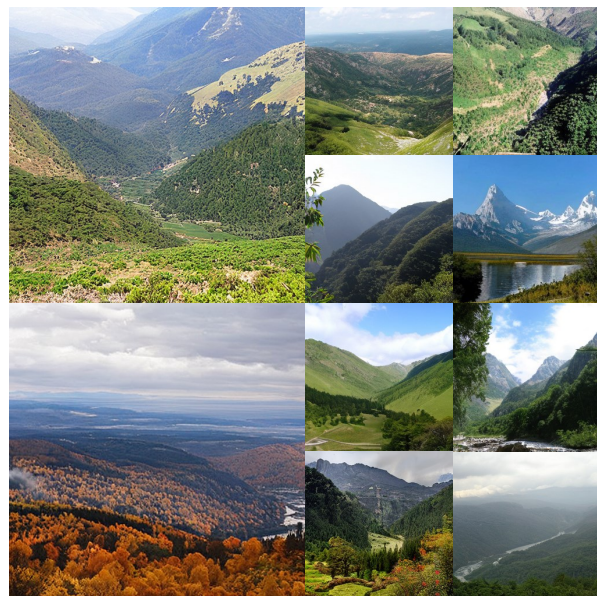

Figure 8. **Generated Samples from xAR.** xAR is able to generate high-fidelity valley (979) images.

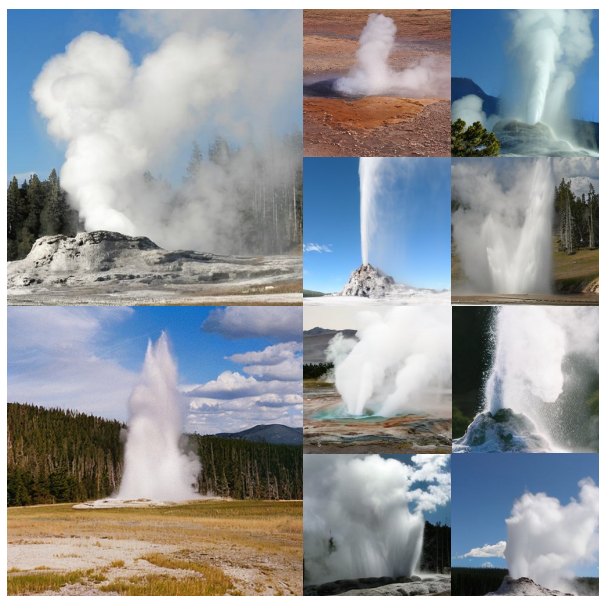

Figure 7. **Generated Samples from xAR.** xAR is able to generate high-fidelity geyser (974) images.

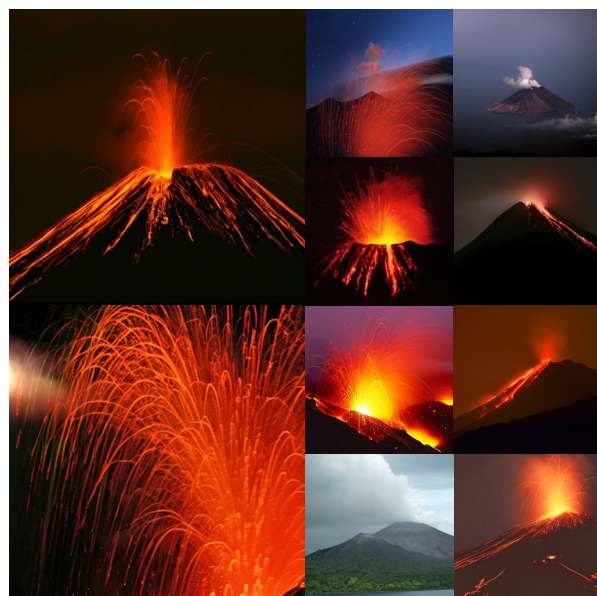

Figure 9. **Generated Samples from xAR.** xAR is able to generate high-fidelity volcano (980) images.

## References

- [1] Diederik P Kingma and Jimmy Ba. Adam: A method for stochastic optimization. In *ICLR*, 2015. [1](#)
- [2] Tianhong Li, Yonglong Tian, He Li, Mingyang Deng, and Kaiming He. Autoregressive image generation without vector quantization. *NeurIPS*, 2024. [1](#)
- [3] Ilya Loshchilov and Frank Hutter. Decoupled weight decay regularization. *ICLR*, 2019. [1](#)
- [4] Nanye Ma, Mark Goldstein, Michael S Albergo, Nicholas M Boffi, Eric Vanden-Eijnden, and Saining Xie. Sit: Exploring flow and diffusion-based generative models with scalable interpolant transformers. In *ECCV*, 2024. [1](#)
- [5] William Peebles and Saining Xie. Scalable diffusion models with transformers. In *ICCV*, 2023. [1](#)
- [6] Sihyun Yu, Sangkyung Kwak, Huiwon Jang, Jongheon Jeong, Jonathan Huang, Jinwoo Shin, and Saining Xie. Representation alignment for generation: Training diffusion transformers is easier than you think. *arXiv preprint arXiv:2410.06940*, 2024. [1](#)
